# Supplementary material for: d-chiro-Inositol facilitates adiponectin biosynthesis and activates the AMPKα/PPARs pathway to inhibit high-fat diet-induced obesity and liver lipid deposition
Source: Royal Society of Chemistry journal article supplement (doi:10.1039/d2fo00869f), 2022-01-01
Supplement: d2fo00869f1.pdf [file d2fo00869f1.pdf]

Supplement 1

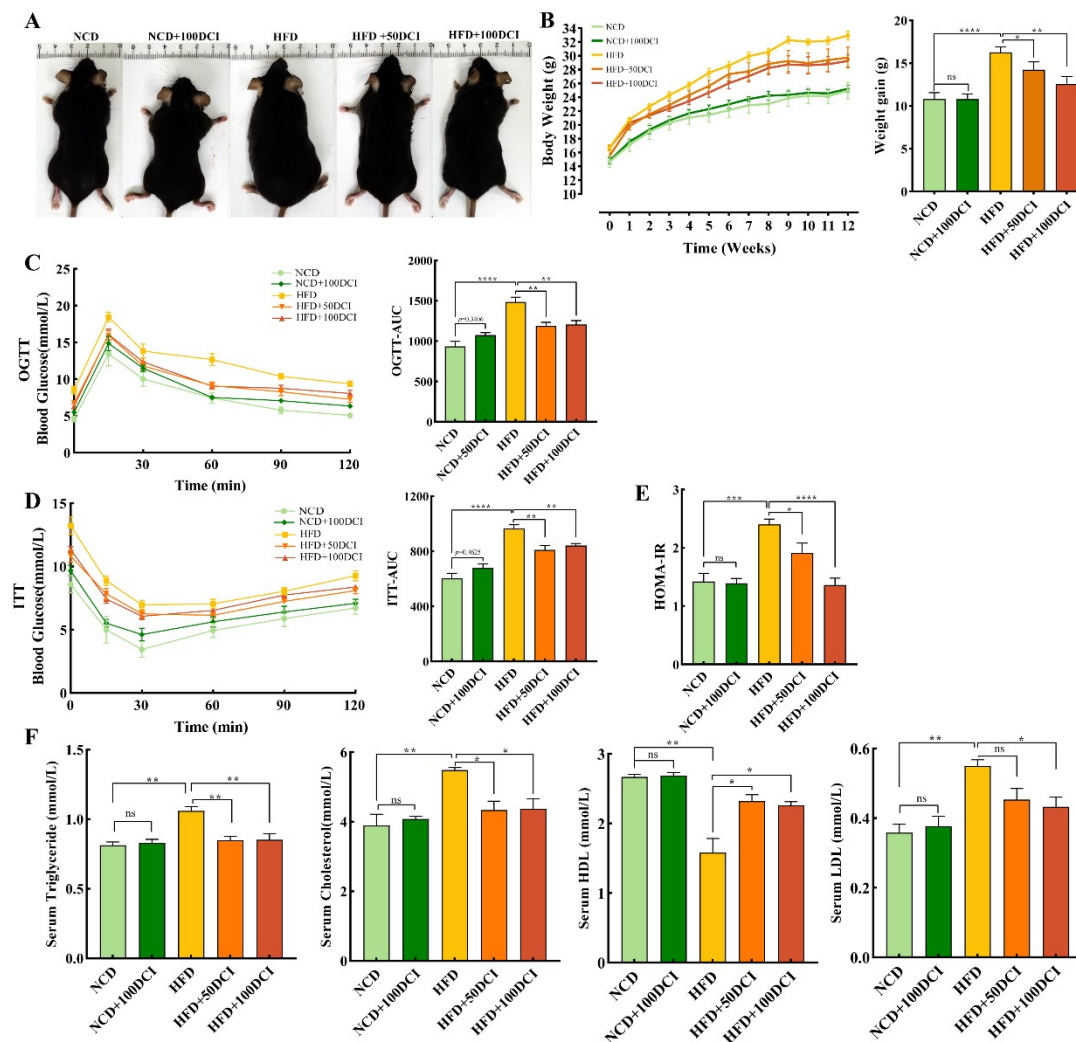

**D-chiro-Inositol reduced obesity and insulin resistance in mice.**

(A) Differences in body shape of mice in each group after 12 weeks of feeding (n=7). (B) Mouse body weight changes within 12 weeks and weight gain at the end of feeding (n=7). (C) Oral glucose tolerance test (OGTT) and area under the curve (OGTT-AUC) (n=7). (D) Insulin tolerance test (ITT) and area under the curve (ITT-AUC) (n=7). (E) Insulin resistance index, HOMA-IR (n=7). (F) Serum triglyceride (TG), total cholesterol (TC), HDL (high-density lipoprotein), LDL (low-density lipoprotein) (n=5). Data presented as means ± SD. \*p < 0.05, \*\*p < 0.01, \*\*\*p < 0.001 and \*\*\*\*p < 0.0001
